1 **Identification of a Type IV CRISPR-Cas system located exclusively on *IncHI1B*/**

2 ***IncFIB* plasmids in *Enterobacteriaceae***

3 Enas Newire<sup>1,2,#</sup>, Alp Aydin<sup>3,##</sup>, Samina Juma<sup>3</sup>, Virve I Enne<sup>3</sup>, Adam P. Roberts<sup>1,4,5,\*</sup>

4

5 <sup>1</sup>UCL Eastman Dental Institute, University College London, 256 Gray's Inn Road, London

6 WC1X 8LD, UK. <sup>2</sup>US. Naval Medical Research Unit-3, Cairo, Egypt. <sup>3</sup>Centre for Clinical

7 Microbiology, University College London, Royal Free Hospital Campus, Rowland Hill Street,

8 London NW3 2PF, UK. <sup>4</sup>Department of Tropical Disease Biology and <sup>5</sup>Centre for Drugs and

9 Diagnostics, Liverpool School of Tropical Medicine, Pembroke Place, Liverpool L3 5QA, UK.

10

11 \*Corresponding Author: Tel: +44(0)151 705 3247; E-mail: [adam.roberts@lstmed.ac.uk](mailto:adam.roberts@lstmed.ac.uk)

12

13

14 **Running Title:** A plasmid based CRISPR-Cas system.

15 **Keywords:** Type IV-B, *IncFIIK*, *IncFIB(K)*, plasmid incompatibility, Mobile genetic element.

16 # Present address; Division of Biosciences, University College London, Gower Street, London,  
17 WC1E 6BT, UK.

18 ## Present address; Quadram Institute, James Watson Road, Norwich, NR4 7UQ

19

20

21

22

23

24

25

26

27

28

29

30

31

32

33

34

35

36 **Abstract [171/250 words]**

37 During an investigation of CRISPR carriage in clinical, multi-drug resistant, *Klebsiella*  
38 *pneumoniae*, a novel CRISPR-Cas system (which we have designated Type IV-B) was  
39 detected on plasmids from two *K. pneumoniae* isolates from Egypt (isolated in 2002-2003)  
40 and a single *K. pneumoniae* isolate from the UK (isolated in 2017). Sequence analysis of  
41 other genomes available in GenBank revealed that this novel Type IV-B CRISPR-Cas system  
42 was present on 28 other plasmids from various *Enterobacteriaceae* hosts and was never  
43 found on the chromosome. Type IV-B is found exclusively on *IncHI1B/ IncFIB* plasmids and is  
44 associated with multiple putative transposable elements. Type IV-B has a single repeat-  
45 spacer array (CRISPR1) upstream of the *cas* loci with some spacers matching regions of  
46 conjugal transfer genes of *IncFIIK/ IncFIB(K)* plasmids suggesting a role in plasmid  
47 incompatibility. Expression of the *cas* loci was confirmed in available clinical isolates by RT-  
48 PCR; indicating the system is active. To our knowledge, this is the first report describing a  
49 new subtype within Type IV CRISPR-Cas systems exclusively associated with *IncHI1B/ IncFIB*  
50 plasmids.

51 **Importance [121/150 words]**

52 Here, we report the identification of a novel subtype of Type IV CRISPR-Cas that is  
53 expressed and exclusively carried by *IncHI1B/ IncFIB* plasmids in *Enterobacteriaceae*,  
54 demonstrating unique evolutionarily juxtaposed connections between CRISPR-Cas and  
55 mobile genetic elements (MGEs). Type IV-B encodes a variety of spacers showing homology  
56 to DNA from various sources, including plasmid specific spacers and is therefore thought to  
57 provide specific immunity against plasmids of other incompatible groups (*IncFIIK/ IncFIB(K)*).

58 The relationship between Type IV-B CRISPR-Cas and MGEs that surround and interrupt the  
59 system is likely to promote rearrangement and be responsible for the observed variability of  
60 this type. Finally, the Type IV-B CRISPR-Cas is likely to co-operate with other *cas* loci within  
61 the bacterial host genome during spacer acquisition.

## 62 **Introduction [247/250 words]**

63 Clustered Regularly Interspaced Short Palindromic Repeats (CRISPR) are widespread,  
64 bacterial adaptive, RNA-mediated, immune systems that target invading foreign DNA such  
65 as bacteriophages and conjugative plasmids<sup>1, 2</sup>. CRISPR functions through a three-stage  
66 process: adaptation involving acquisition of foreign DNA molecules spacers, expression and  
67 maturation of the short CRISPR RNAs (crRNAs), and the interference with a cognate invading  
68 foreign DNA molecule<sup>3</sup>. To date, CRISPR-Cas systems are classified into 2 classes, 5 Types (I-  
69 V) and 33 subtypes<sup>4</sup>. The two classes are differentiated based on the effector module; class  
70 1 utilises multi-protein effector Cas complexes, while class 2 utilise a single-protein effector  
71 (either Cas9 or Cpf1)<sup>5, 6</sup>. All types are confirmed, or expected, to provide immunity against  
72 invading DNA, while Type III CRISPR-Cas systems can target both DNA and RNA<sup>7, 8</sup>.

73 Type IV was previously called the Unknown Type, due to its rare occurrence and lack of the  
74 adaptation module, until an updated classification in 2015<sup>7, 9</sup>. In 2017, Type IV classification  
75 was updated to show an associated repeat-spacer array for a *cas* loci that has *csf1* (*cas8*-  
76 *Like*), *csf2* (*cas7*), *csf3* (*cas5*), *csf4* (*dinG*) and *csf5* (*cas6-Like*) genetic arrangement,  
77 respectively<sup>4</sup>. Type IV is the only type to possess *csf4* (*dinG*)<sup>4</sup>. Type IV CRISPR-Cas systems  
78 were shown to employ crRNA-guided effector complexes in 2019<sup>8</sup>. It has been hypothesised

79 that Type IV is similar to an ancestral innate immune system that gained adaptive ability by  
80 associating with a transposon-like element containing *cas1* and *cas2*<sup>3</sup>.

## 81 **Results [186/150 words]**

82 A novel CRISPR-cas family, which we have designated Type IV-B due to the presence of *dinG*,  
83 containing a repeat-spacer array, leader sequence and *cas* loci was detected on thirty-one  
84 (three clinical isolates and twenty-eight genomes in GenBank) *IncHI1B/ IncFIB(Mar)*  
85 plasmids from *Enterobacteriaceae* (Figure 1A, Table S1). Type IV-B *cas* loci show homology  
86 to each other, while *csf5* (*cas6*) in Type IV-B shows 100% protein identity to Type I-E  
87 *cas6*. Type IV-B CRISPR-Cas systems could be grouped according to the presence of an IS  
88 element interrupting the *cas* loci and both groups are associated with multiple MGEs (Figure  
89 1A). We also identified partial *cas* loci (*cas6* and *dinG*) on other *IncHI1B/ IncFIB(Mar)*  
90 plasmids (Table S1). A single repeat-spacer CRISPR1<sup>10</sup> array was identified upstream of all  
91 *cas* loci. The repeats have a predicted stem-loop secondary-structure likely involved in pre-  
92 crRNA processing (Figure 1B, 1C). Spacer-1 in CP018720.1 and spacer-20 in CP014776.1  
93 correspond to *IncFIIK* conjugal transfer genes; *traN* and *traL*, respectively. The Protospacer  
94 Adjacent Motif (PAM) alignment revealed the leader-proximal repeat signature  
95 conservation (TGCC/TTAT). Finally, RT-PCR demonstrated that Type IV-B *cas* loci genes (*csf2*,  
96 *dinG* and *cas6*) are expressed.

## 97 **Discussion [197/200 words]**

98 Type IV CRISPR-Cas systems are the only ones possessing *dinG*<sup>4</sup>, therefore we propose the  
99 CRISPR-Cas system described here be designated Type IV-B. Unlike classical Type IV, Type IV-

100 B lacks *cas8-like* and *cas5*, however, it has *dinG* and *cas7* (involved in interference), and *cas6*  
101 (involved in expression and maturation of short crRNAs)<sup>11-13</sup>. Type IV-B has a variable  
102 repeat-spacer array and a conserved leader sequence. Expression of Type IV-B genes  
103 indicates system activity; likely providing immunity to incoming DNA matching the spacers<sup>8</sup>.  
104 The spacers demonstrated conservation and polymorphism and cluster into two main  
105 groups (Figure 2A, 2B) both matching DNA from a variety of sources. However, the  
106 adaptation module is missing, thus adding new spacers will require *cas1* and *cas2* from  
107 other CRISPR-Cas that exist within the *Enterobacteriaceae* genomes. Interestingly, some of  
108 Type IV-B spacers match conjugal transfer genes *traN* and *traL* of *IncFIIK/IncFIB(K)* plasmids,  
109 suggesting a role in plasmid incompatibility.

110 Type IV-B demonstrates a complex evolutionary connection with MGEs in terms of  
111 parasitism and immunity<sup>14</sup>. The association between Type IV-B and multiple MGEs, plus the  
112 identification of partial *cas* loci on other *IncHI1B/IncFIB(Mar)* plasmids, indicates that  
113 dynamic, MGE mediated rearrangement, of CRISPR-Cas Type IV-B is ongoing.

#### 114 **Conclusion [56/75 words]**

115 To our knowledge, this is the first identification of a CRISPR-Cas system, which we have  
116 designated Type IV-B, exclusively associated with plasmids. The system demonstrates an  
117 evolutionary association and role for MGEs in dissemination and, additionally, the spacer  
118 analysis suggests a role in plasmid incompatibility. We propose updating the CRISPR-Cas  
119 system classification to include Type IV-B.

120 **Materials and Methods [125/125 words]**

121 **Isolate information** Clinical *K. pneumoniae-53* and *K. pneumoniae-65* were isolated from  
122 Egyptian university teaching hospitals (2002-2003), and *K. pneumoniae-CR5* from University  
123 College London Hospital in the UK (2017).

124 **CRISPR-Cas loci expression** RT-PCR was performed using LightCycler<sup>®</sup> RNA Amplification Kit  
125 SYBR Green (Roche Diagnostics Ltd., UK). The primers were (*csf2*-  
126 fw:AAAATGCGGTCTCAACTCCG; *csf2*-rev: TGACGAAGAGTTCCCGAATG), (*dinG*-  
127 fw:GAGTCTGCCGATTGTCGTTA; *dinG*-rev:GTACCAGATAGCCCAGCGTTT) and (*cas6*-  
128 fw:AATGCGTTTCGGTTGCGTATC; *cas6*-rev:GAGTACGGCAGCTTCTCTCC).

129 **Bioinformatics analysis** DNA sequences were analysed using CRISPRFinder, CRISPRTarget  
130 and Snappene (GSL Biotech)<sup>12, 15, 16</sup>. Multi-Locus Sequence Typing, resistance genes and  
131 plasmids were identified using MLST, ResFinder and PlasmidFinder, respectively<sup>17</sup>. Spacer  
132 analysis was performed by BLAST and Geneious<sup>18</sup>. A phylogenetic UPGMA-based tree was  
133 constructed for CRISPR using MEGA7<sup>19, 20</sup>. Direct repeats and PAM conservation were  
134 assessed using WebLogo, RNA secondary structure was predicted using RNAfold<sup>21-23</sup>.

135 **Funding**

136 E. N. was supported by a grant from the Schlumberger Foundation's Faculty for the Future  
137 Programme (2012-2016).

138 **Transparency declarations**

139 None to declare.

## 140 References

- 141 1. Marraffini, L.A. and E.J. Sontheimer, *CRISPR interference: RNA-directed adaptive immunity in*  
142 *bacteria and archaea*. Nature Reviews Genetics, 2010. **11**(3): p. 181-90.
- 143 2. Barrangou, R., et al., *CRISPR provides acquired resistance against viruses in prokaryotes*.  
144 Science, 2007. **315**(5819): p. 1709-1712.
- 145 3. Rath, D., et al., *The CRISPR-Cas immune system: biology, mechanisms and applications*.  
146 Biochimie, 2015. **117**(2015): p. 119-28.
- 147 4. Koonin, E.V., K.S. Makarova, and F. Zhang, *Diversity, classification and evolution of CRISPR-*  
148 *Cas systems*. Current Opinion in Microbiology, 2017. **37**(1): p. 67-78.
- 149 5. Makarova, K.S., F. Zhang, and E.V. Koonin, *SnapShot: Class 1 CRISPR-Cas Systems*. Cell, 2017.  
150 **168**(5): p. 946-946.e1.
- 151 6. Makarova, K.S., et al., *An updated evolutionary classification of CRISPR-Cas systems*. Nature  
152 Reviews Microbiology, 2015. **13**(11): p. 722-36.
- 153 7. Zhang, Q. and Y. Ye, *Not all predicted CRISPR-Cas systems are equal: isolated cas genes and*  
154 *classes of CRISPR like elements*. BMC Bioinformatics, 2017. **18**(1): p. 92.
- 155 8. Ozcan, A., et al., *Type IV CRISPR RNA processing and effector complex formation in*  
156 *Aromatoleum aromaticum*. Nat Microbiol, 2019. **4**(1): p. 89-96.
- 157 9. Makarova, K.S., Y.I. Wolf, and E.V. Koonin, *The basic building blocks and evolution of CRISPR-*  
158 *CAS systems*. Biochem Soc Trans, 2013. **41**(6): p. 1392-400.
- 159 10. Touchon, M., et al., *CRISPR distribution within the Escherichia coli species is not suggestive of*  
160 *immunity-associated diversifying selection*. Journal of Bacteriology, 2011. **193**(10): p. 2460-7.
- 161 11. Koonin, E.V. and M. Krupovic, *Evolution of adaptive immunity from transposable elements*  
162 *combined with innate immune systems*. Nat Rev Genet, 2015. **16**(3): p. 184-92.
- 163 12. Lundgren, M., E. Charpentier, and P.C. Fineran, *CRISPR Methods and Protocols*. Methods in  
164 Molecular Biology. Vol. 1311 2015, New York Springer Science Business Media New York
- 165 13. Dwarakanath, S., et al., *Interference activity of a minimal Type I CRISPR-Cas system from*  
166 *Shewanella putrefaciens*. Nucleic Acids Res, 2015. **43**(18): p. 8913-23.
- 167 14. Koonin, E.V. and K.S. Makarova, *Mobile genetic elements and evolution of CRISPR-Cas*  
168 *systems: all the way there and back*. Genome Biology and Evolution, 2017. **9**(10): p. 2812-  
169 2825.
- 170 15. Grissa, I., G. Vergnaud, and C. Pourcel, *CRISPRFinder: a web tool to identify clustered*  
171 *regularly interspaced short palindromic repeats*. Nucleic Acids Research, 2007b. **35**(2): p.  
172 W52-7.
- 173 16. GSL, "SnapGene software (from GSL Biotech; available at [snapgene.com](http://snapgene.com))", Biotech Chicago,  
174 IL.
- 175 17. Carattoli, A., et al., *In silico detection and typing of plasmids using PlasmidFinder and plasmid*  
176 *multilocus sequence typing*. Antimicrob Agents Chemother, 2014. **58**(7): p. 3895-903.
- 177 18. Kearse, M., et al., *Geneious Basic: an integrated and extendable desktop software platform*  
178 *for the organization and analysis of sequence data*. Bioinformatics, 2012. **28**(12): p. 1647-9.
- 179 19. Kumar, S., G. Stecher, and K. Tamura, *MEGA7: molecular evolutionary genetics analysis*  
180 *version 7.0 for bigger datasets*. Molecular Biology and Evolution, 2016. **33**(7): p. 1870-4.
- 181 20. Shen, J., et al., *Comparative analysis of CRISPR-Cas systems in Klebsiella genomes*. Journal of  
182 Basic Microbiology, 2017. **57**(4): p. 325-336.
- 183 21. Crooks, G.E., et al., *WebLogo: a sequence logo generator*. Genome Research, 2004. **14**(6): p.  
184 1188-90.
- 185 22. Mathews, D.H., *Predicting a set of minimal free energy RNA secondary structures common to*  
186 *two sequences*. Bioinformatics, 2005. **21**(10): p. 2246-53.

187 23. Hofacker, I.L., *Vienna RNA secondary structure server*. Nucleic Acids Research, 2003. **31**(13):  
188 p. 3429-31.

189

190

191

192

193

194

195

196

197

198

199

200

201

202

203

204

205

206

207

208

209

210

211

212

213

214

215

216

217

218



219 **Figures**

220

**A**

221 **1 Type U**

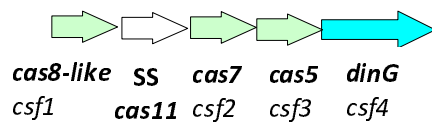

223

224 **2 Type IV (putative)**

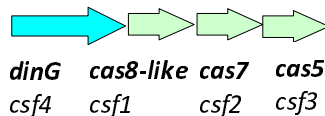

226

227 **3 Type IV**

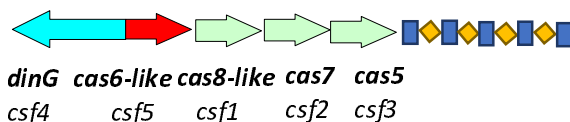

229

230 **4 Type IV variant**

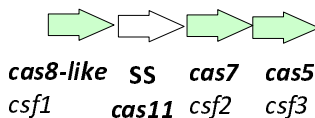

232

233

234 **5 Type IV-B group 1**

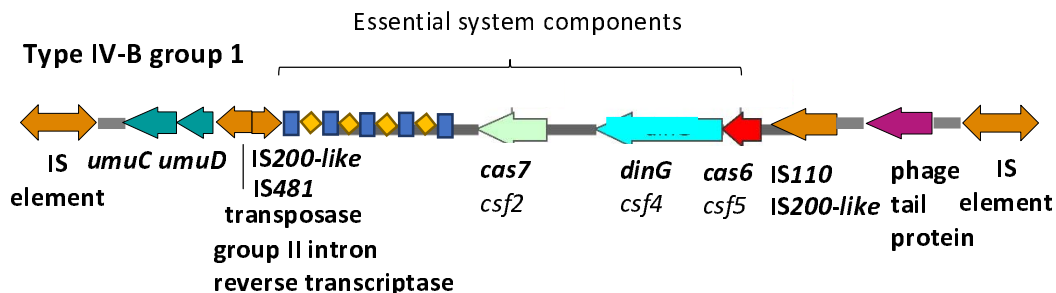

235

236

237

238 **6 Type IV-B group 2**

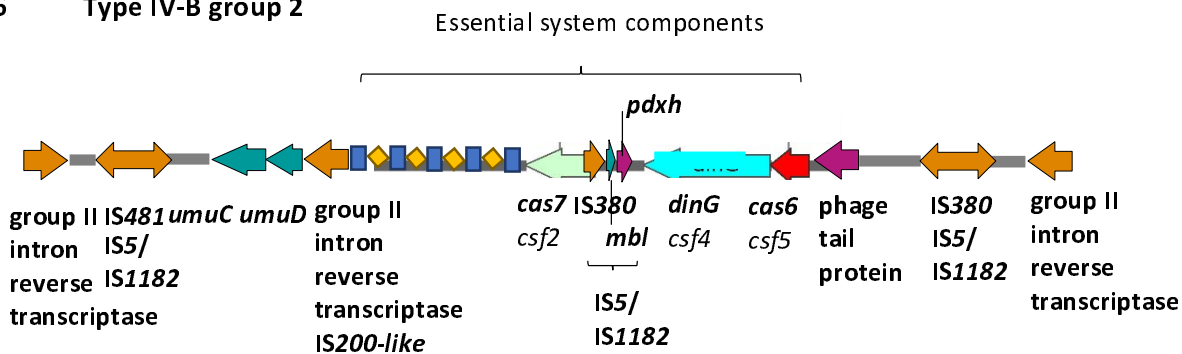

240

241

242

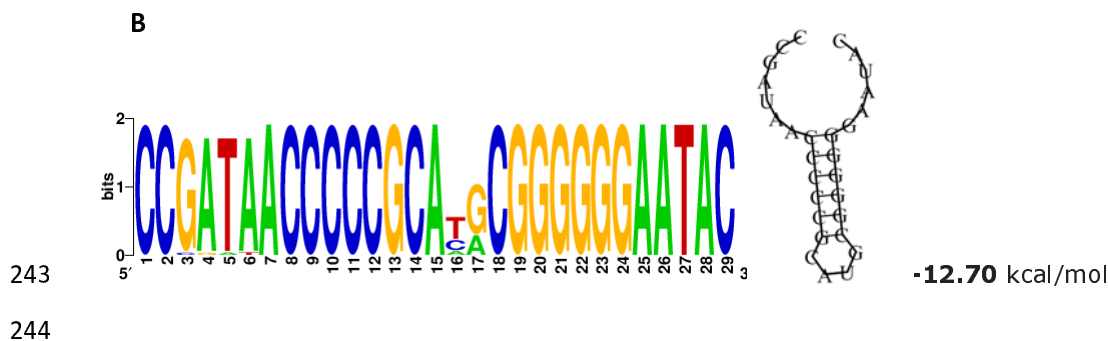

244

245 **Figure 1: Type IV-B CRISPR-Cas system.** (A) Schematic representation of Type IV CRISPR-Cas  
246 systems and the two groups of Type IV-B described here. Panel 1 is Type U (unknown) as  
247 identified in 2013<sup>9</sup>. Panel 2 is Type IV (putative) as identified in *Acidithiobacillus ferrooxidans*  
248 in 2015<sup>6</sup>. Panel 3 is Type IV and Panel 4 is Type IV variant identified in *Thioalkalivibrio sp.*  
249 K90mix (TK90\_2699-TK90\_2703) and *Rhodococcus jostii* RHA1 (RHA1\_ro10069-  
250 RHA1\_ro10072), respectively, in 2017<sup>14</sup>. Panel 5 is Type IV-B group 1 and Panel 6 is Type IV-  
251 B group 2 as detected in *Enterobacteriaceae* isolates and genomes in this study. Arrows in  
252 different colours represent genes; red represents *cas6*; bright blue represents *dinG*; light  
253 green represents *cas7*; white represents *cas11*; blue-yellow pattern represents the direct  
254 repeat-spacer loci; orange represents the location of the associated MGEs occurring  
255 upstream (*IS5/ IS1182, IS630, IS6, IS1, IS481* or *IS110*) and downstream (*IS5/ IS1182, IS630,*  
256 *IS6, IS5-like, IS3000, ISKra4, IS10L* or group II intron reverse transcriptase) of the system;  
257 green represents resistance genes; purple represents other genes associated with the  
258 system. (B) Conservation of the repeats and predicted stable stem-loop secondary structure  
259 predicted to be involved in the mechanism of pre-crRNA processing. The height of the  
260 letters in the sequence logo shows the relative frequency of their recurrence at that  
261 position. Wobbles at position 16 and 17 are within the loop of the predicted stem-loop

262 structure and are therefore tolerated in the structural prediction shown in C; (C) The  
263 predicted secondary structure of direct repeats and the associated Minimum Free Energy  
264 (MFE) estimated in (kcal/mol) shown underneath the structure.

265

266

267

268

269

270

271

272

273

274

275

276

277

278

| Isolate                   | CRISPR1 |    |    |    |    |    |    |    |    |    |    |    |    |    |    |    |    |    |    |    |    |    |  |  |  |  |  |  |  |  |  |  |  |  |  |
|---------------------------|---------|----|----|----|----|----|----|----|----|----|----|----|----|----|----|----|----|----|----|----|----|----|--|--|--|--|--|--|--|--|--|--|--|--|--|
| CP011314.1                | 1       | 2  | 3  | 4  | 5  | 6  | 7  | 8  | 9  | 10 | 11 | 12 |    |    |    |    |    |    |    |    |    |    |  |  |  |  |  |  |  |  |  |  |  |  |  |
|                           | P       | P  | P  | CO | CO | O  | CO | CO | Ph | P  | CO | Ph |    |    |    |    |    |    |    |    |    |    |  |  |  |  |  |  |  |  |  |  |  |  |  |
| HG918041.1                | 1       | 2  | 3  | 13 | 13 | 14 | 5  | 27 | 28 | 6  | 7  | 29 | 25 | 9  | 30 | 15 | 10 | 11 | 12 |    |    |    |  |  |  |  |  |  |  |  |  |  |  |  |  |
|                           | P       | P  | P  | CO | CO | CO | CO | CO | O  | CO | O  | CO | O  | CO | Ph | S  | O  | P  | CO | Ph |    |    |  |  |  |  |  |  |  |  |  |  |  |  |  |
| CP018961.1                | 24      | 3  | 13 | 14 | 5  | 27 | 28 | 29 | 25 | 9  | 30 | 10 | 13 | 26 | 11 |    |    |    |    |    |    |    |  |  |  |  |  |  |  |  |  |  |  |  |  |
|                           | CO      | P  | CO | CO | CO | CO | O  | CO | Ph | S  | P  | CO | CE | CO |    |    |    |    |    |    |    |    |  |  |  |  |  |  |  |  |  |  |  |  |  |
| CP017986.1                | 1       | 2  | 3  | 13 | 14 | 5  | 27 | 28 | 29 | 9  | 30 | 15 | 10 | 13 | 26 | 11 | 16 |    |    |    |    |    |  |  |  |  |  |  |  |  |  |  |  |  |  |
|                           | P       | P  | P  | CO | CO | CO | CO | CO | O  | Ph | S  | O  | P  | CO | CE | CO | CO |    |    |    |    |    |  |  |  |  |  |  |  |  |  |  |  |  |  |
| CP018720.1                | 24      | 1  | 2  | 3  | 13 | 14 | 5  | 27 | 28 | 29 | 9  | 30 | 15 | 10 | 13 | 26 | 11 | 16 |    |    |    |    |  |  |  |  |  |  |  |  |  |  |  |  |  |
|                           | CO      | P  | P  | P  | CO | CO | CO | CO | O  | Ph | S  | O  | P  | CO | CE | CO | CO |    |    |    |    |    |  |  |  |  |  |  |  |  |  |  |  |  |  |
| CP018714.1                | 1       | 2  | 3  | 13 | 14 | 5  | 27 | 28 | 29 | 9  | 30 | 15 | 10 | 13 | 26 | 11 | 16 |    |    |    |    |    |  |  |  |  |  |  |  |  |  |  |  |  |  |
|                           | P       | P  | P  | CO | CO | CO | CO | CO | O  | Ph | S  | O  | P  | CO | CE | CO | CO |    |    |    |    |    |  |  |  |  |  |  |  |  |  |  |  |  |  |
| CP018708.1                | 24      | 1  | 2  | 3  | 13 | 14 | 5  | 27 | 28 | 29 | 9  | 30 | 15 | 10 | 13 | 26 | 11 | 16 |    |    |    |    |  |  |  |  |  |  |  |  |  |  |  |  |  |
|                           | CO      | P  | P  | P  | CO | CO | CO | CO | O  | Ph | S  | O  | P  | CO | CE | CO | CO |    |    |    |    |    |  |  |  |  |  |  |  |  |  |  |  |  |  |
| CP018702.1                | 24      | 1  | 2  | 3  | 13 | 14 | 5  | 27 | 28 | 29 | 9  | 30 | 15 | 10 | 13 | 26 | 11 | 16 |    |    |    |    |  |  |  |  |  |  |  |  |  |  |  |  |  |
|                           | CO      | P  | P  | P  | CO | CO | CO | CO | O  | Ph | S  | O  | P  | CO | CE | CO | CO |    |    |    |    |    |  |  |  |  |  |  |  |  |  |  |  |  |  |
| CP018696.1                | 24      | 1  | 2  | 3  | 13 | 14 | 5  | 27 | 28 | 29 | 9  | 30 | 15 | 10 | 13 | 26 | 11 | 16 |    |    |    |    |  |  |  |  |  |  |  |  |  |  |  |  |  |
|                           | CO      | P  | P  | P  | CO | CO | CO | CO | O  | Ph | S  | O  | P  | CO | CE | CO | CO |    |    |    |    |    |  |  |  |  |  |  |  |  |  |  |  |  |  |
| LN824134.1                | 1       | 2  | 3  | 14 | 5  | 27 | 28 | 6  | 7  | 15 | 10 | 26 | 11 | 12 | 12 | 17 |    |    |    |    |    |    |  |  |  |  |  |  |  |  |  |  |  |  |  |
|                           | P       | P  | P  | CO | CO | CO | CO | O  | CO | O  | P  | CO | CE | CO | Ph | Ph | S  |    |    |    |    |    |  |  |  |  |  |  |  |  |  |  |  |  |  |
| JN420336.1                | 18      | 19 | 3  |    |    |    |    |    |    |    |    |    |    |    |    |    |    |    |    |    |    |    |  |  |  |  |  |  |  |  |  |  |  |  |  |
|                           | S       | P  | P  |    |    |    |    |    |    |    |    |    |    |    |    |    |    |    |    |    |    |    |  |  |  |  |  |  |  |  |  |  |  |  |  |
| MF150122.1                | 24      | 1  | 2  | 3  | 13 | 14 | 31 | 8  | 5  | 27 | 28 | 29 | 25 | 8  | 9  | 30 | 15 | 10 | 13 | 26 | 11 | 12 |  |  |  |  |  |  |  |  |  |  |  |  |  |
|                           | CO      | P  | P  | P  | CO | CO | CO | CO | CO | CO | O  | CO | CO | Ph | S  | O  | P  | CO | CE | CO | Ph |    |  |  |  |  |  |  |  |  |  |  |  |  |  |
| CP014776.1                | 18      | 20 | 21 | 8  | 9  | 30 | 22 | 23 | 13 | 26 | 11 | 19 | 12 | 17 |    |    |    |    |    |    |    |    |  |  |  |  |  |  |  |  |  |  |  |  |  |
|                           | S       | P  | CO | CO | Ph | S  | CO | CO | CO | CE | CO | P  | Ph | S  | CO | CO |    |    |    |    |    |    |  |  |  |  |  |  |  |  |  |  |  |  |  |
| CP020854.1                | 1       | 2  | 3  | 13 | 14 | 5  | 27 | 28 | 29 | 9  | 30 | 15 | 10 | 13 | 26 | 11 | 16 |    |    |    |    |    |  |  |  |  |  |  |  |  |  |  |  |  |  |
|                           | P       | P  | P  | CO | CO | CO | CO | CO | O  | Ph | S  | O  | P  | CO | CE | CO | CO |    |    |    |    |    |  |  |  |  |  |  |  |  |  |  |  |  |  |
| CP018313.1                | 1       | 2  | 3  | 13 | 14 | 5  | 27 | 28 | 29 | 9  | 30 | 15 | 10 | 13 | 26 | 11 | 16 |    |    |    |    |    |  |  |  |  |  |  |  |  |  |  |  |  |  |
|                           | P       | P  | P  | CO | CO | CO | CO | CO | O  | Ph | S  | O  | P  | CO | CE | CO | CO |    |    |    |    |    |  |  |  |  |  |  |  |  |  |  |  |  |  |
| CP018339.1                | 18      | 20 | 21 | 33 | 34 | 9  | 30 | 22 | 23 | 13 | 26 | 17 |    |    |    |    |    |    |    |    |    |    |  |  |  |  |  |  |  |  |  |  |  |  |  |
|                           | S       | P  | CO | S  | CO | Ph | S  | CO | CO | CO | CE | S  | CO |    |    |    |    |    |    |    |    |    |  |  |  |  |  |  |  |  |  |  |  |  |  |
| CP020068.1                | 18      | 20 | 21 | 8  | 9  | 30 | 22 | 23 | 13 | 26 | 12 | 17 |    |    |    |    |    |    |    |    |    |    |  |  |  |  |  |  |  |  |  |  |  |  |  |
|                           | S       | P  | CO | CO | Ph | S  | CO | CO | CO | CE | Ph | S  |    |    |    |    |    |    |    |    |    |    |  |  |  |  |  |  |  |  |  |  |  |  |  |
| CP016921.1                | 18      | 20 | 21 | 8  | 9  | 30 | 22 | 23 | 13 | 26 | 12 | 17 |    |    |    |    |    |    |    |    |    |    |  |  |  |  |  |  |  |  |  |  |  |  |  |
|                           | S       | P  | CO | CO | Ph | S  | CO | CO | CO | CE | Ph | S  |    |    |    |    |    |    |    |    |    |    |  |  |  |  |  |  |  |  |  |  |  |  |  |
| CP006799.1                | 18      | 20 | 21 | 8  | 9  | 30 | 22 | 23 | 13 | 26 | 12 | 17 |    |    |    |    |    |    |    |    |    |    |  |  |  |  |  |  |  |  |  |  |  |  |  |
|                           | S       | P  | CO | CO | Ph | S  | CO | CO | CO | CE | Ph | S  |    |    |    |    |    |    |    |    |    |    |  |  |  |  |  |  |  |  |  |  |  |  |  |
| CP015501.1                | 1       | 2  | 3  | 14 | 5  | 27 | 28 | 6  | 7  | 15 | 23 | 10 | 26 | 11 | 12 | 12 | 17 |    |    |    |    |    |  |  |  |  |  |  |  |  |  |  |  |  |  |
|                           | P       | P  | P  | CO | CO | CO | CO | O  | CO | O  | CO | P  | CE | CO | Ph | Ph | S  |    |    |    |    |    |  |  |  |  |  |  |  |  |  |  |  |  |  |
| CP008933.1                | 18      | 20 | 32 | 20 | 21 | 8  | 19 | 3  |    |    |    |    |    |    |    |    |    |    |    |    |    |    |  |  |  |  |  |  |  |  |  |  |  |  |  |
|                           | S       | P  | CO | P  | CO | CO | P  | P  |    |    |    |    |    |    |    |    |    |    |    |    |    |    |  |  |  |  |  |  |  |  |  |  |  |  |  |
| CP012754.1                | 18      | 20 | 21 | 8  | 9  | 30 | 22 | 23 | 13 | 26 | 12 | 17 |    |    |    |    |    |    |    |    |    |    |  |  |  |  |  |  |  |  |  |  |  |  |  |
|                           | S       | P  | CO | CO | Ph | S  | CO | CO | CO | CE | Ph | S  |    |    |    |    |    |    |    |    |    |    |  |  |  |  |  |  |  |  |  |  |  |  |  |
| CP018687.1                | 1       | 2  | 3  | 13 | 14 | 5  | 27 | 28 | 29 | 9  | 30 | 15 | 10 | 13 | 26 | 11 | 16 |    |    |    |    |    |  |  |  |  |  |  |  |  |  |  |  |  |  |
|                           | P       | P  | P  | CO | CO | CO | CO | CO | O  | Ph | S  | O  | P  | CO | CE | CO | CO |    |    |    |    |    |  |  |  |  |  |  |  |  |  |  |  |  |  |
| CP026398.1                | 18      | 20 | 32 | 20 | 21 | 8  | 34 | 9  | 30 | 22 | 23 | 13 | 26 | 11 | 35 | 17 | 34 | 33 |    |    |    |    |  |  |  |  |  |  |  |  |  |  |  |  |  |
|                           | S       | P  | CO | P  | CO | CO | CO | Ph | S  | CO | CO | CO | CE | CO | CO | S  | CO | CO |    |    |    |    |  |  |  |  |  |  |  |  |  |  |  |  |  |
| CP020848.1                | 3       | 19 | 8  | 21 | 20 | 32 | 20 | 18 |    |    |    |    |    |    |    |    |    |    |    |    |    |    |  |  |  |  |  |  |  |  |  |  |  |  |  |
|                           | P       | P  | CO | CO | P  | CO | P  | S  |    |    |    |    |    |    |    |    |    |    |    |    |    |    |  |  |  |  |  |  |  |  |  |  |  |  |  |
| CP024507.1                | 17      | 19 | 26 | 13 | 23 | 22 | 30 | 9  | 8  | 21 | 20 | 18 |    |    |    |    |    |    |    |    |    |    |  |  |  |  |  |  |  |  |  |  |  |  |  |
|                           | S       | P  | CE | CO | CO | CO | S  | Ph | CO | CO | P  | S  |    |    |    |    |    |    |    |    |    |    |  |  |  |  |  |  |  |  |  |  |  |  |  |
| CP026172.1                | 33      | 34 | 17 | 35 | 11 | 26 | 13 | 23 | 22 | 30 | 9  | 34 | 8  | 21 | 20 | 32 | 20 | 18 |    |    |    |    |  |  |  |  |  |  |  |  |  |  |  |  |  |
|                           | CO      | CO | S  | CO | CO | CE | CO | CO | CO | S  | Ph | CO | CO | CO | P  | CO | P  | S  |    |    |    |    |  |  |  |  |  |  |  |  |  |  |  |  |  |
| CP025462.1                | 8       | 9  | 30 | 22 | 23 | 11 | 12 | 17 |    |    |    |    |    |    |    |    |    |    |    |    |    |    |  |  |  |  |  |  |  |  |  |  |  |  |  |
|                           | CO      | Ph | S  | CO | CO | CO | Ph | S  |    |    |    |    |    |    |    |    |    |    |    |    |    |    |  |  |  |  |  |  |  |  |  |  |  |  |  |
| <i>K. pneumoniae</i> -53  | 1       | 2  | 3  | 4  | 5  | 6  | 7  | 8  | 9  | 10 | 11 | 12 |    |    |    |    |    |    |    |    |    |    |  |  |  |  |  |  |  |  |  |  |  |  |  |
|                           | P       | P  | P  | CO | CO | O  | CO | CO | Ph | P  | CO | Ph |    |    |    |    |    |    |    |    |    |    |  |  |  |  |  |  |  |  |  |  |  |  |  |
| <i>K. pneumoniae</i> -65  | 1       | 2  | 3  | 4  | 5  | 6  | 7  | 8  | 9  | 10 | 11 | 12 |    |    |    |    |    |    |    |    |    |    |  |  |  |  |  |  |  |  |  |  |  |  |  |
|                           | P       | P  | P  | CO | CO | O  | CO | CO | Ph | P  | CO | Ph |    |    |    |    |    |    |    |    |    |    |  |  |  |  |  |  |  |  |  |  |  |  |  |
| <i>K. pneumoniae</i> -CR5 | 18      | 20 | 32 | 18 | 20 | 22 | 33 | 9  | 34 | 23 | 10 | 13 |    |    |    |    |    |    |    |    |    |    |  |  |  |  |  |  |  |  |  |  |  |  |  |
|                           | S       | P  | CO | S  | P  | CO | P  | S  | S  | CO | CO | Ph | CO | CE | P  | CO | CO | P  | CO | P  | P  |    |  |  |  |  |  |  |  |  |  |  |  |  |  |

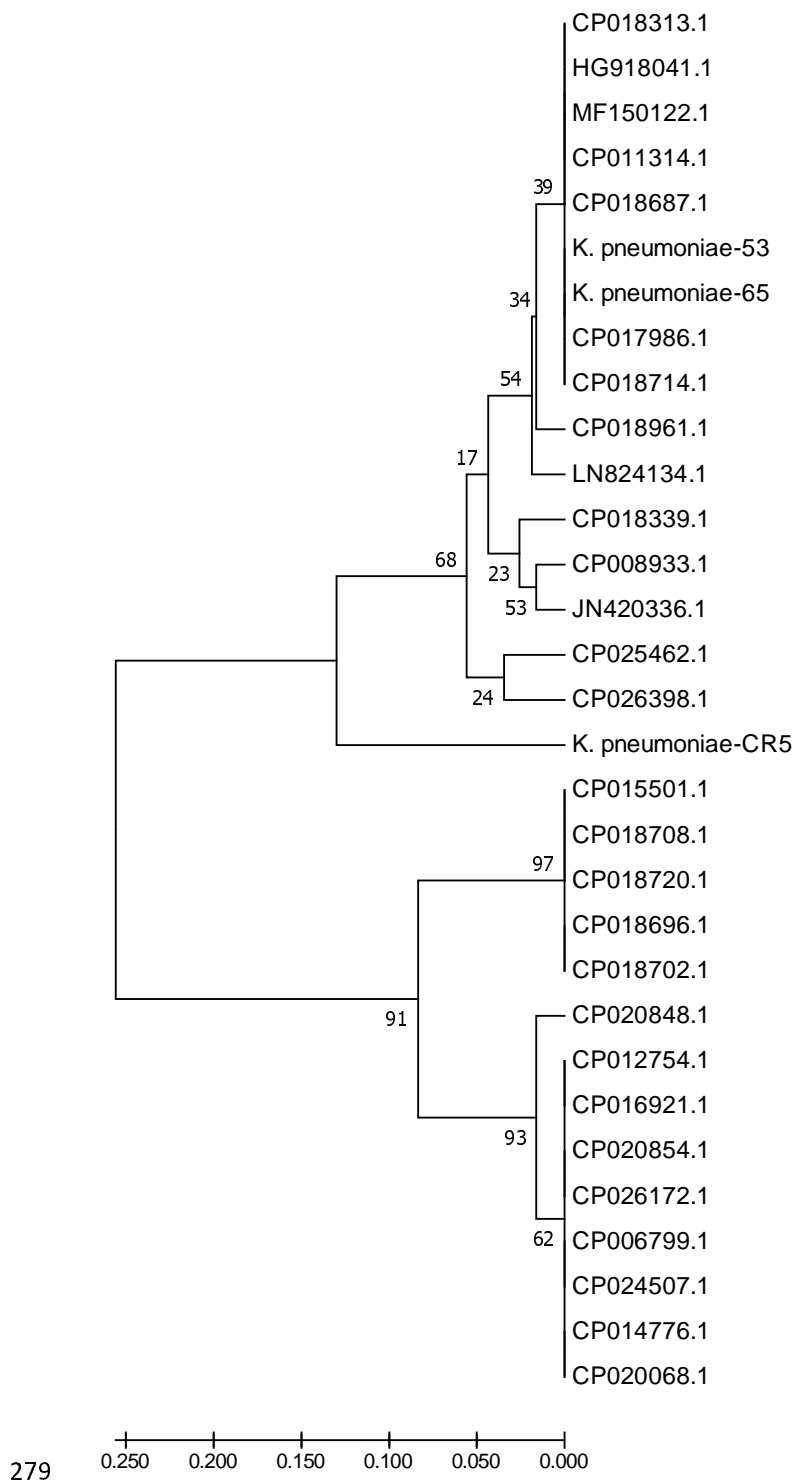

279  
280 **Figure 2: Type IV-B CRISPR spacer polymorphism and evolutionary relationships.** (A) The  
281 spacers map. Only spacers are represented by boxes, and no repeats are included. Identical

282 spacers are represented by the same number and colour, while unique spacers are  
283 represented by white colour and no number is associated with the box. Self-targeting  
284 spacers are indicated by letter (S) and show 100% identity to host DNA, plasmid-targeting  
285 spacers are indicated by letter (P), phage targeting spacers are indicated by letters (Ph),  
286 other *Enterobacteriaceae* targeting spacers (100% identity) are indicated by letter (O),  
287 cryptic spacers with similarity to other bacterial DNA are indicated by letters (CO), and those  
288 with similarity to Eukaryotic DNA are indicated by letters (CE) that are positioned  
289 underneath the relevant spacer. CE spacers showed at least 57% identity to eukaryotic DNA.  
290 CE spacers were confirmed by multiple sequences alignments. (B) The phylogenetic tree  
291 illustrating the evolutionary relationships of the Type IV-B repeat-spacer CRISPR loci.  
292 Phylogenetic UPGMA tree was constructed using the MUSCLE algorithm of MEGA7. The tree  
293 is drawn to scale, with branch lengths in the same units as those of the evolutionary  
294 distances used to infer the phylogenetic tree. The evolutionary distances were computed  
295 using the Maximum Likelihood method, [bootstrap test (1000 replicates), and the rate  
296 variation among sites was modelled with a gamma distribution (shape parameter = 1).

297

298

299

300

301

302 **Supplementary Table**  
 303 **Table S1: Type IV-B *IncHI1B/ IncFIB (Mar)* plasmids information. †**

|   | Strain (Accession number)                                             | ST      | location (date) | plasmid        | Resistance genes                                                                                                                                                                                                                              | Repeat-spacer CRISPR loci* |        |               |              |               | Type IV-B Structure |
|---|-----------------------------------------------------------------------|---------|-----------------|----------------|-----------------------------------------------------------------------------------------------------------------------------------------------------------------------------------------------------------------------------------------------|----------------------------|--------|---------------|--------------|---------------|---------------------|
|   |                                                                       |         |                 |                |                                                                                                                                                                                                                                               | Start                      | End    | Spacer number | Length of DR | CRISPR length |                     |
| 1 | <i>K. pneumoniae</i> strain 234-12 plasmid pKpn23412-362 (CP011314.1) | ST-514  | UK (2015)       | <i>IncHI1B</i> | <i>merC, aph(6)-I<sub>d</sub>, tmrB, terY, terX, terW, terZ, terA, terB, terC, bla<sub>TEM-1</sub>, bla<sub>CTX-M-15</sub>, bla<sub>OXA-1</sub>, aacA4, aph(3''), aac(3)-IIa, aac(6')Ib-cr, strA, strB, catB4, catA1, sul2, tet(A), dfrA1</i> | 141865                     | 142618 | 12            | 23           | 753           |                     |
| 2 | <i>K. pneumoniae</i> Kp15 plasmid pENVA (HG918041.1)                  | unknown | Germany (2014)  | <i>IncH</i>    | <i>merD, merA, merP, qnrB4, aadA, terY, terX, terW, terZ, terA, terB, terC, bla<sub>CTX-M-15</sub>, bla<sub>DHA-1</sub>, qacE, bla<sub>TEM-1</sub>, aadA1, aac(3)-II, sul1, tet(A), dfrA15</i>                                                | 99454                      | 100629 | 19            | 23           | 1175          |                     |
| 3 | <i>E. coli</i> strain EcoI_422 plasmid pEC422_1 (CP018961.1)          | ST-2    | UK (2016)       | <i>IncHI1B</i> | <i>tetC, sul1, mer, qnrE1, terY, terX, terW, terZ, terA, terB, terC, bla<sub>CTX-M-2</sub>, qacE, bla<sub>OXA-1</sub>, bla<sub>TEM-26</sub>, aac(6')Ib-cr, aac(3)-IIa, mph(A), catB3, arr-3, sul1</i>                                         | 276922                     | 277868 | 15            | 29           | 946           |                     |
| 4 | <i>K. pneumoniae</i> strain 825795-1 plasmid unnamed1 (CP017986.1)    | ST-147  | Germany (2016)  | <i>IncHI1B</i> | <i>terA</i>                                                                                                                                                                                                                                   | 148524                     | 149585 | 17            | 30           | 1061          |                     |
| 5 | <i>K. pneumoniae</i> strain KP_Goe_828304 plasmid                     | ST-147  | Germany (2016)  | <i>IncHI1B</i> | <i>terY, terX, terW, terZ, terA, terB, terC</i>                                                                                                                                                                                               | 24563                      | 25679  | 18            | 24           | 1116          |                     |

|   | Strain<br>(Accession number)                                                       | ST     | location<br>(date) | plasmid        | Resistance genes                                | Repeat-spacer CRISPR loci * |        |               |              |               | Type IV-B Structure |
|---|------------------------------------------------------------------------------------|--------|--------------------|----------------|-------------------------------------------------|-----------------------------|--------|---------------|--------------|---------------|---------------------|
|   |                                                                                    |        |                    |                |                                                 | Start                       | End    | Spacer number | Length of DR | CRISPR length |                     |
| 6 | <i>K. pneumoniae</i> strain<br>Kp_Goe_152021 plasmid<br>pKp_Goe_021-1 (CP018714.1) | ST-147 | Germany (2016)     | <i>IncHI1B</i> | <i>terY, terX, terW, terZ, terA, terB, terC</i> | 7687                        | 8748   | 17            | 30           | 1061          |                     |
| 7 | <i>K. pneumoniae</i> strain<br>Kp_Goe_827026 plasmid<br>pKp_Goe_026-1 (CP018708.1) | ST-147 | Germany (2016)     | <i>IncHI1B</i> | none                                            | 54661                       | 55777  | 18            | 24           | 1116          |                     |
| 8 | <i>K. pneumoniae</i> strain<br>Kp_Goe_827024 plasmid<br>pKp_Goe_024-1 (CP018702.1) | ST-147 | Germany (2016)     | <i>IncHI1B</i> | <i>terY, terX, terW, terZ, terZ, terB, terC</i> | 5006                        | 6122   | 18            | 24           | 1116          |                     |
| 9 | <i>K. pneumoniae</i> strain<br>Kp_Goe_149832 plasmid<br>pKp_Goe_832-1 (CP018696.1) | ST-147 | Germany (2016)     | <i>IncHI1B</i> | <i>terY, terX, terW, terZ, terA, terB, terC</i> | 102143                      | 103259 | 18            | 24           | 1116          |                     |



|    | Strain (Accession number)                                  | ST      | location (date)  | plasmid             | Resistance genes                                                                                                                                                                                                                                                                                                                                                                    | Repeat-spacer CRISPR loci* |        |               |              |               | Type IV-B Structure |
|----|------------------------------------------------------------|---------|------------------|---------------------|-------------------------------------------------------------------------------------------------------------------------------------------------------------------------------------------------------------------------------------------------------------------------------------------------------------------------------------------------------------------------------------|----------------------------|--------|---------------|--------------|---------------|---------------------|
|    |                                                            |         |                  |                     |                                                                                                                                                                                                                                                                                                                                                                                     | Start                      | End    | Spacer number | Length of DR | CRISPR length |                     |
| 10 | <i>K. pneumoniae</i> MS6671.v1, plasmid (LN824134.1)       | ST-147  | Australia (2015) | <i>IncHI1B</i>      | none                                                                                                                                                                                                                                                                                                                                                                                | 16764                      | 17823  | 17            | 29           | 1059          |                     |
| 11 | <i>K. pneumoniae</i> plasmid pNDM-MAR (JN420336.1)         | ST-15   | Italy (2011)     | <i>IncH</i>         | <i>bla</i> <sub>NDM-1</sub> , <i>ble</i> <sub>MBL</sub> , <i>qnrB66</i> , <i>merR</i> , <i>terY3</i> , <i>terY1</i> , <i>terW</i> , <i>terZ</i> , <i>terA</i> , <i>terC</i> , <i>terD</i> , <i>terE</i> , <i>terF</i> , <i>bla</i> <sub>CTX-M-15</sub> , <i>bla</i> <sub>OXA-1</sub> , <i>aac(6')Ib-cr</i> , <i>aac(6')Ib-cr</i> , <i>catA1</i> , <i>catB4</i>                      | 240016                     | 240226 | 3             | 28           | 210           |                     |
| 12 | <i>K. pneumoniae</i> A64477 plasmid pKP64477b (MF150122.1) |         | Brazil (2017)    | <i>IncHI1B</i>      | <i>terZ</i> , <i>terA</i> , <i>terB</i> , <i>terD</i>                                                                                                                                                                                                                                                                                                                               | 84064                      | 85428  | 22            | 29           | 1364          |                     |
| 13 | <i>P. gergoviae</i> FB2 plasmid pFB2.1 (CPO14776.1)        | unknown | Malaysia (2016)  | <i>IncFIB (Mar)</i> | <i>terF</i> , <i>terC</i> , <i>terB</i> , <i>terA</i> , <i>terZ</i> , <i>terW</i> , <i>terY</i> , <i>terF</i>                                                                                                                                                                                                                                                                       | 56849                      | 57852  | 16            | 29           | 1003          |                     |
| 14 | <i>K. pneumoniae</i> KPNS28 plasmid pKPNS28-1 (CPO20854.1) | ST-14   | USA (2013)       | <i>IncHI1B</i>      | <i>bla</i> <sub>NDM-1</sub> , <i>bla</i> <sub>OXA-1</sub> , <i>terF</i> , <i>terC</i> , <i>terB</i> , <i>terA</i> , <i>terZ</i> , <i>terW</i> , <i>terY</i> , <i>terX</i> , <i>sul1</i> , <i>dfrA12</i> , <i>dfrA14</i> , <i>qnrB1</i> , <i>aac(6')Ib-cr</i> , <i>aph(3')-Via</i> , <i>armA</i> , <i>aadA2</i> , <i>aac(6')Ib-cr</i> , <i>mph(E)</i> , <i>msr(E)</i> , <i>catB4</i> | 251737                     | 252495 | 12            | 29           | 758           |                     |
| 15 | <i>K. pneumoniae</i> Kp_Goe_149473 plasmid                 | ST-147  | Germany (2016)   | <i>IncHI1B</i>      | <i>terY</i> , <i>terX</i> , <i>terW</i> , <i>terZ</i> , <i>terA</i> , <i>terB</i> , <i>terC</i> , <i>terF</i>                                                                                                                                                                                                                                                                       | 116666                     | 117727 | 17            | 30           | 1061          |                     |

|    | Strain<br>(Accession<br>number)                                                             | ST     | location<br>(date) | plasmid                | Resistance genes                                                                                                                                                                                                                                                                                                            | Repeat-spacer CRISPR loci* |        |                  |                 |                  | Type IV-B Structure |
|----|---------------------------------------------------------------------------------------------|--------|--------------------|------------------------|-----------------------------------------------------------------------------------------------------------------------------------------------------------------------------------------------------------------------------------------------------------------------------------------------------------------------------|----------------------------|--------|------------------|-----------------|------------------|---------------------|
|    |                                                                                             |        |                    |                        |                                                                                                                                                                                                                                                                                                                             | Start                      | End    | Spacer<br>number | Length<br>of DR | CRISPR<br>length |                     |
| 16 | <i>K. pneumoniae</i><br>strain<br>Kp_Goe_822579<br>plasmid<br>pKp_Goe_579-1<br>(CP018313.1) | ST-147 | Germany<br>(2016)  | <i>IncHI1B</i>         | none                                                                                                                                                                                                                                                                                                                        | 94773                      | 95834  | 17               | 30              | 1061             |                     |
| 17 | <i>K. pneumoniae</i><br>Kp_Goe_154414<br>plasmid<br>pKp_Goe_414-1<br>(CP018339.1)           | ST-23  | Germany<br>(2016)  | <i>IncFIB</i><br>(Mar) | <i>terY, terX, terW, terZ, terA,</i><br><i>terB, terC, terF</i>                                                                                                                                                                                                                                                             | 75291                      | 76111  | 13               | 29              | 820              |                     |
| 18 | <i>K. pneumoniae</i><br>AR_0068 plasmid<br>unitig_1<br>(CP020068.1)                         | ST-14  | USA<br>(2017)      | <i>IncHI1B</i>         | <i>terF, terC, terB, terA, terZ,</i><br><i>terW, terY, terX, aac(3)-IId,</i><br><i>sul1, dfrA12, aph(3''),</i><br><i>aph(6)-Id, aph(3')-VI,</i><br><i>aadA2, bla&lt;sub&gt;SHV-11&lt;/sub&gt;, bla&lt;sub&gt;NDM-1&lt;/sub&gt;,</i><br><i>strA, strB, aac(3)-IId,</i><br><i>armA, aadA2, mph(E),</i><br><i>msr(E), sul2</i> | 136244                     | 137004 | 12               | 29              | 760              |                     |
| 19 | <i>K. pneumoniae</i><br>11 plasmid<br>pIncHI1B_DHQP1<br>300920<br>(CP016921.1)              | ST-14  | USA<br>(2016)      | <i>IncHI1B</i>         | <i>terZ, terA, terB, terC, terF,</i><br><i>dfrA1, terY, terX, terW,</i><br><i>aph(3'), aacA4, ant(3''),</i><br><i>bla&lt;sub&gt;NDM-1&lt;/sub&gt;, bla&lt;sub&gt;OXA-1&lt;/sub&gt;, aac(6')Ib-<br/>cr, armA, aadA2, aac(6')Ib-<br/>cr, qnrB1, mph(E), msr(E),</i><br><i>catB4, sul, dfrA14, dfrA12</i>                      | 229597                     | 230357 | 12               | 29              | 760              |                     |

|    | Strain (Accession number)                                           | ST     | location (date) | plasmid                       | Resistance genes                                                                                                                                                                                | Repeat-spacer CRISPR loci * |        |               |              |               | Type IV-B Structure |
|----|---------------------------------------------------------------------|--------|-----------------|-------------------------------|-------------------------------------------------------------------------------------------------------------------------------------------------------------------------------------------------|-----------------------------|--------|---------------|--------------|---------------|---------------------|
|    |                                                                     |        |                 |                               |                                                                                                                                                                                                 | Start                       | End    | Spacer number | Length of DR | CRISPR length |                     |
| 20 | <i>K. pneumoniae</i> KP617 plasmid KP-plasmid1 (CP012754.1)         | ST-14  | Korea (2015)    | <i>IncHI1B</i>                | <i>terY, terX, terW, terZ, terA, terB, terC, terF, qnrB1, qacEDelta1, ble<sub>MBL</sub>, merE, aph(3')-VI, bla<sub>NDM-1</sub>, aadA2, arma, msr(E), mph(E), sul1, dfrA12</i>                   | 114404                      | 115164 | 12            | 29           | 760           |                     |
| 21 | <i>K. pneumoniae</i> PittNDM01 plasmid1 (CP006799.1)                | ST-14  | USA (2013)      | <i>IncHI1B</i>                | <i>terF, terE, terC, terA, terZ, terW, terY, terX, bla<sub>OXA-1</sub>, bla<sub>NDM-1</sub>, merE, qnrB1, aac(6')-Ib, aph(3')-VI, arma, aadA2, msr(E), mph(E), catB4, sul1, dfrA14, dfrA12</i>  | 114132                      | 114892 | 12            | 29           | 760           |                     |
| 22 | <i>K. pneumoniae</i> SKGH01 plasmid unnamed 1 (CP015501.1)          | ST-147 | UAE (2016)      | <i>IncHI1B</i>                | <i>terF, terC, terA, terZ, terW, terY, nreA, chrA, terX</i>                                                                                                                                     | 7545                        | 8597   | 17            | 29           | 1052          |                     |
| 23 | <i>K. pneumoniae</i> strain PMK1 plasmid pPMK1-NDM (CP008933.1)     | ST-15  | UK (2014)       | <i>IncHI1B</i>                | <i>bla<sub>CTX-M-15</sub>, aadA2, arma, aac(6')Ib-cr, bla<sub>OXA-1</sub>, bla<sub>NDM-1</sub>, qnrB66, msr(E), mph(E), catA1, catB4, sul1, dfrA12</i>                                          | 10628                       | 11144  | 8             | 30           | 516           |                     |
| 24 | <i>K. pneumoniae</i> strain KPNIH48 plasmid pKPN-eda (CP026398.1)   | ST-252 | USA (2018)      | <i>IncHI1B / IncFIB (Mar)</i> | none                                                                                                                                                                                            | 7401                        | 8525   | 18            | 29           | 1124          |                     |
| 25 | <i>K. pneumoniae</i> strain KPN1481 plasmid pKPN1481-1 (CP020848.1) | ST-906 | USA (2017)      | <i>IncHI1B / IncFIB (Mar)</i> | <i>aac(6')-Ib, aadA1, aac(6')Ib-cr, bla<sub>OXA-9</sub>, bla<sub>TEM-1A</sub>, bla<sub>NDM-1</sub>, bla<sub>OXA-1</sub>, bla<sub>CTX-M-15</sub>, aac(6')-Ib-cr, qnrB1, aac(6')-Ib-cr, catB4</i> | 325794                      | 326308 | 8             | 29           | 514           |                     |

|    | Strain (Accession number)                                          | ST     | location (date)  | plasmid                       | Resistance genes                                                                                                                                                                                                                                                                    | Repeat-spacer CRISPR loci* |        |               |              |               | Type IV-B Structure |
|----|--------------------------------------------------------------------|--------|------------------|-------------------------------|-------------------------------------------------------------------------------------------------------------------------------------------------------------------------------------------------------------------------------------------------------------------------------------|----------------------------|--------|---------------|--------------|---------------|---------------------|
|    |                                                                    |        |                  |                               |                                                                                                                                                                                                                                                                                     | Start                      | End    | Spacer number | Length of DR | CRISPR length |                     |
| 26 | <i>K. pneumoniae</i> strain KSB2_1B plasmid unnamed1 (CP024507.1)  | ST-323 | Australia (2017) | <i>IncFIB (Mar)</i>           | none                                                                                                                                                                                                                                                                                | 41987                      | 42747  | 12            | 29           | 760           |                     |
| 27 | <i>K. pneumoniae</i> strain KPNIH50 plasmid pKPN-bbef (CP026172.1) | ST-252 | USA (2018)       | <i>IncHI1B / IncFIB (Mar)</i> | none                                                                                                                                                                                                                                                                                | 227283                     | 228407 | 18            | 29           | 1124          |                     |
| 28 | <i>K. pneumoniae</i> strain F44 plasmid p44-1 (CP025462.1)         | ST-11  | USA (2017)       | <i>IncHI1B / IncFIB (Mar)</i> | <i>aac(3)-Ild, bla<sub>TEM-1B</sub>, bla<sub>SHV-12</sub>, mph(A)</i>                                                                                                                                                                                                               | 42604                      | 43120  | 8             | 29           | 516           |                     |
| 29 | <i>K. pneumoniae</i> -53 plasmid 1                                 | ST-502 | Egypt (2002)     | <i>IncHI1B / IncFIB (Mar)</i> | <i>dfrA1</i>                                                                                                                                                                                                                                                                        | 19059                      | 19812  | 12            | 23           | 753           |                     |
| 30 | <i>K. pneumoniae</i> -65 plasmid 1                                 | ST-15  | Egypt (2003)     | <i>IncFIB (Mar)</i>           | none                                                                                                                                                                                                                                                                                | 6012                       | 6765   | 12            | 23           | 753           |                     |
| 31 | <i>K. pneumoniae</i> -CR5 plasmid 1                                | ST-392 | UK (2017)        | <i>IncFIB (Mar)</i>           | <i>aac(6')Ib-cr, aac(3)-IIa, strA, aac(3)-IId, strB, armA, bla<sub>TEM-1B</sub>, bla<sub>CTX-M-15</sub>, bla<sub>DHA-1</sub>, bla<sub>SHV-11</sub>, bla<sub>NDM-1</sub>, bla<sub>OXA-1</sub>, aac(6')Ib-cr, oqxB, oqxA, qnrB66, fosA, msr(E), mph(E), catB4, sul2, sul1, dfrA14</i> | 5467                       | 6833   | 22            | 29           | 1366          |                     |
| A  | <i>K. pneumoniae</i> strain K66-45 plasmid pK66-45-1               | ST-11  | Norway (2017)    | <i>IncFIB (Mar) / IncHI1B</i> | <i>aph(3')-VI, armA, aadA2, bla<sub>NDM-1</sub>, bla<sub>CTX-M-15</sub>, qnrS1, mph(E), msr(E), sul1, dfrA12</i>                                                                                                                                                                    |                            |        |               |              |               |                     |

|   | Strain (Accession number)                                            | ST     | location (date) | plasmid                    | Resistance genes                                                                                                                                                                                                     | Repeat-spacer CRISPR loci * |     |               |              |               | Type IV-B Structure |
|---|----------------------------------------------------------------------|--------|-----------------|----------------------------|----------------------------------------------------------------------------------------------------------------------------------------------------------------------------------------------------------------------|-----------------------------|-----|---------------|--------------|---------------|---------------------|
|   |                                                                      |        |                 |                            |                                                                                                                                                                                                                      | Start                       | End | Spacer number | Length of DR | CRISPR length |                     |
| B | <i>K. pneumoniae</i> strain AR_0158 plasmid tig00000727 (CP021699.1) | ST-163 | USA (2017)      | <i>IncFIB(Mar)/IncHI1B</i> | <i>aac(6')Ib-cr</i> , <i>aac(3)-IIId</i> , <i>bla<sub>OXA-1</sub></i> , <i>bla<sub>SHV-2</sub></i> , <i>bla<sub>NDM-1</sub></i> , <i>aac(6')-Ib-cr</i> , <i>qnrB1</i> , <i>catB4</i> , <i>tet(B)</i> , <i>dfrA30</i> |                             |     |               |              |               |                     |
| C | <i>K. pneumoniae</i> strain LS356 plasmid pKP8-2 (CP025638.1)        | ST-485 | China (2018)    | <i>IncHI1B</i>             | none                                                                                                                                                                                                                 |                             |     |               |              |               |                     |

304

305 † Items 1-31 are the plasmids that carried complete Type IV-B CRISPR-Cas system. Items A-C represent examples of partial Type IV-B components that were found  
 306 carried on the same plasmids.

307 \* All detected repeat-spacer CRISPR were CRISPR1.

308
